# Supplementary material for: Molecular genetic and geochemical assays reveal severe contamination of drinking water reservoirs at the ancient Maya city of Tikal
Source: PubMed Central journal article supplement (PMC7316703; doi:10.1038/s41598-020-67044-z), 2020-06-25
Supplement: 41598_2020_67044_MOESM1_ESM.pdf [file 41598_2020_67044_MOESM1_ESM.pdf]

Molecular genetic and geochemical assays reveal severe contamination of drinking water reservoirs at the ancient Maya city of Tikal

### **Authors**

David L. Lentz, Trinity L. Hamilton, Nicholas P. Dunning, Vernon L. Scarborough, Todd P. Luxton, Anne Vonderheide, Eric J. Tepe, Cory J. Perfetta, James Brunemann, Liwy Grazioso, Fred Valdez, Kenneth B. Tankersley, Alison A. Weiss

### **Community composition and genetic diversity**

In terms of alpha diversity, DNA samples from Palace and Temple Reservoirs at Tikal had the highest diversity at the OTU and genus levels compared to the Corriental and Perdido Reservoirs. Alpha diversity in the Perdido Reservoir samples showed a large range including the lowest diversity observed in all samples. At the Phylum level, the majority of OTUs recovered from all the sites were affiliated with Actinobacteria, Proteobacteria, Chloroflexi and Acidobacteria. Smaller numbers of OTUs affiliated with Planctomycetes, Robubacteria, Thaumarchaeota and Verrucomicrobia were also observed (Supplementary Fig. S4).

Following our molecular analyses, at the Phylum level, the majority of OTUs recovered from all the sites were affiliated Actinobacteria, Proteobacteria, Chloroflexi and Acidobacteria. Smaller numbers of OTUs affiliated with Planctomycetes, Robubacteria, Thaumarchaeota and Verrucomicrobia were also observed. At the Class level (Supplementary Fig. S5), the majority of OTUs recovered from the surface samples and Temple and Palace Reservoirs were affiliated with Actinobacteria, Alphaproteobacteria, Subgroup 6 and Thermoleophilia. OTUs affiliated with Thermoleophilia accounted for > ~20-25% of all sequences in these samples. In contrast, OTUs affiliated with Actinobacteria and Alphaproteobacteria accounted from >50% of the total sequences in most of Preclassic and Early Classic Period Perdido Reservoir samples. The two exceptions were the Late Classic and the Late Preclassic samples— Thermoleophilia was also abundant in these samples. In the Perdido Reservoir samples, Alphaproteobacteria and Actinobacteria were the most abundant. Smaller numbers of Acidomicrobiia, Subgroup 6, MB\_A2\_108, and NC10 were observed in all the samples. Sequences affiliated with Bacilli were also abundant in the Palace Reservoir samples. We recovered OTUs affiliated with Oxyphotobacteria (phototrophic Cyanobacteria) from a subset of the samples (Fig. 4).

**Supplementary Fig. S1.** Chronology of Tikal. The Gregorian column represents the recording of time according to the modern Christian calendar and the Long Count represents the Maya calendar. The site core of Tikal was abandoned during the Terminal Classic period. Time periods follow Houston and Inomata<sup>1</sup>.

| Period      |          | Gregorian  | Tikal Ceramics | Long Count |
|-------------|----------|------------|----------------|------------|
| Postclassic |          | 1100       |                |            |
|             |          | 1000       | Caban          | 10.10      |
| Classic     | Terminal | 900        | Eznab          | 10.0       |
|             | Late     | 800        | Imix           |            |
|             |          | 700        | Ik             |            |
|             | Early    | 600        |                | 9.10       |
|             |          | 500        | 3              |            |
| 400         |          | 2<br>Manik |                |            |
|             |          | 300        | 1              | 8.10       |
| Preclassic  | Late     | 200        | Cimi           | 8.0        |
|             |          | 100        | Cauac          |            |
|             |          | 1          |                |            |
|             | Middle   | 100 BC     |                | Chuen      |
|             |          | 200 BC     |                |            |
|             |          | 300 BC     |                |            |
|             |          | 400 BC     |                | Tzec       |
|             |          | 500 BC     |                |            |
|             |          | 600 BC     |                |            |
|             |          | 700 BC     |                | Eb         |
| 800 BC      |          |            |                |            |
|             |          | 900        |                |            |
|             |          | 1000       |                |            |
|             |          | 1100       |                |            |

**Supplementary Fig. S2.** One of the last rulers of Tikal, Dark Sun, may have suffered from metabolic syndrome related to chronic mercury poisoning. Obesity is one of the side effects of the syndrome. This image was drawn by William R. Coe from the carved surface of Lintel 2 in Temple III (Courtesy of the Penn Museum, image no. Tikal 57-5-7).

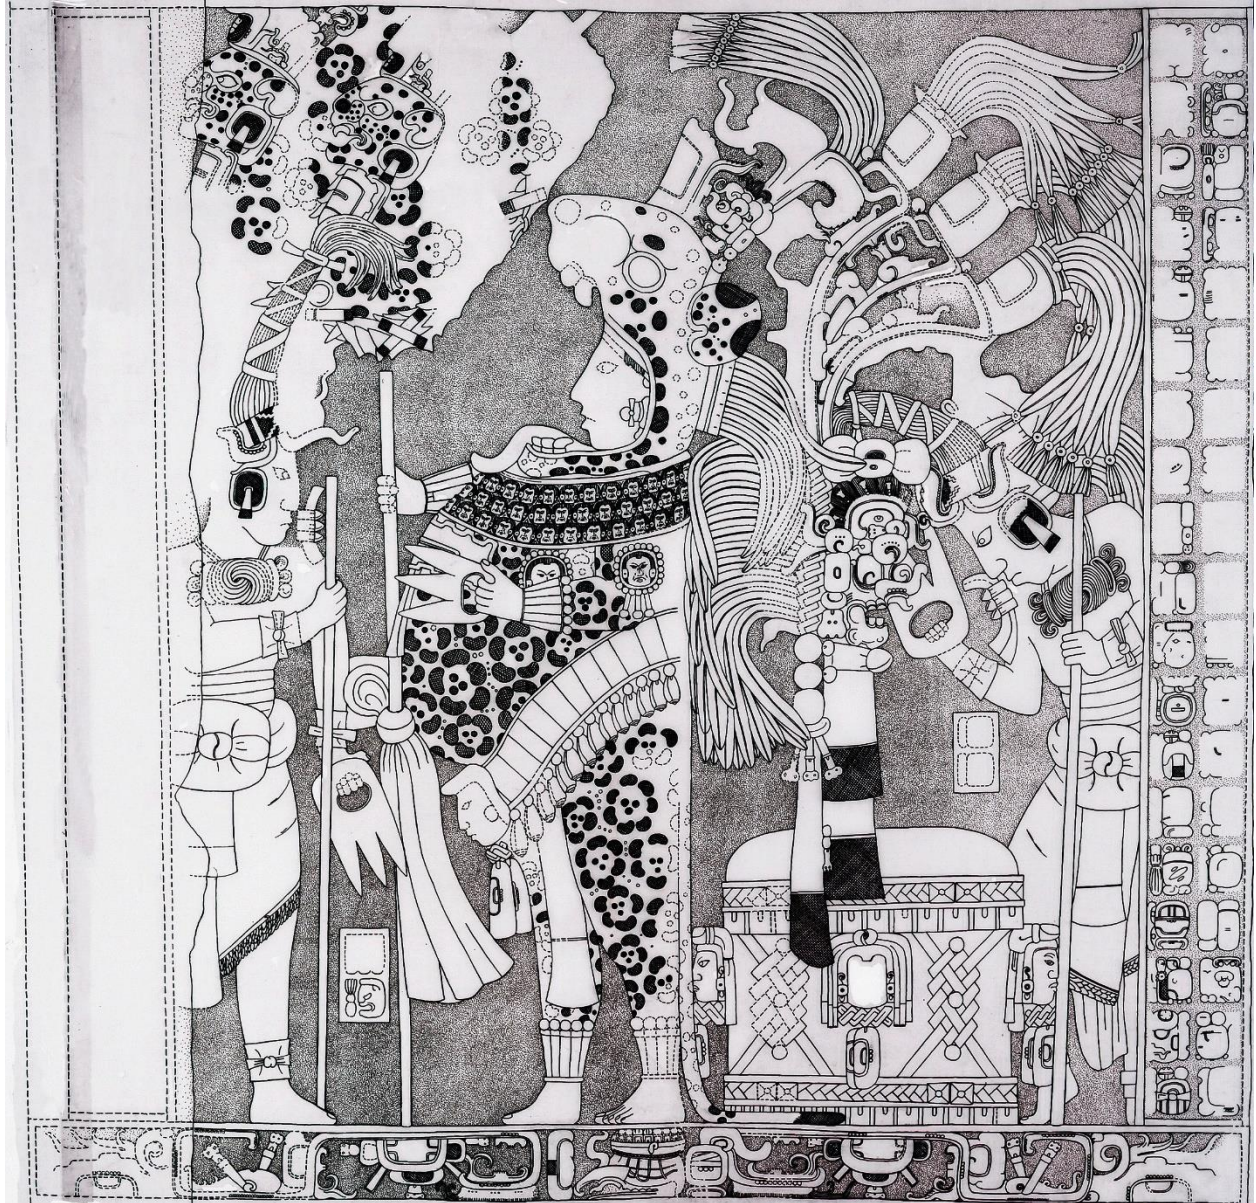

**Supplementary Fig. S3.** A PCoA analysis of Bray-Curtis similarities indicate that microbial communities from the surface were distinct from those of the Precolumbian strata of the Temple and Palace Reservoirs.

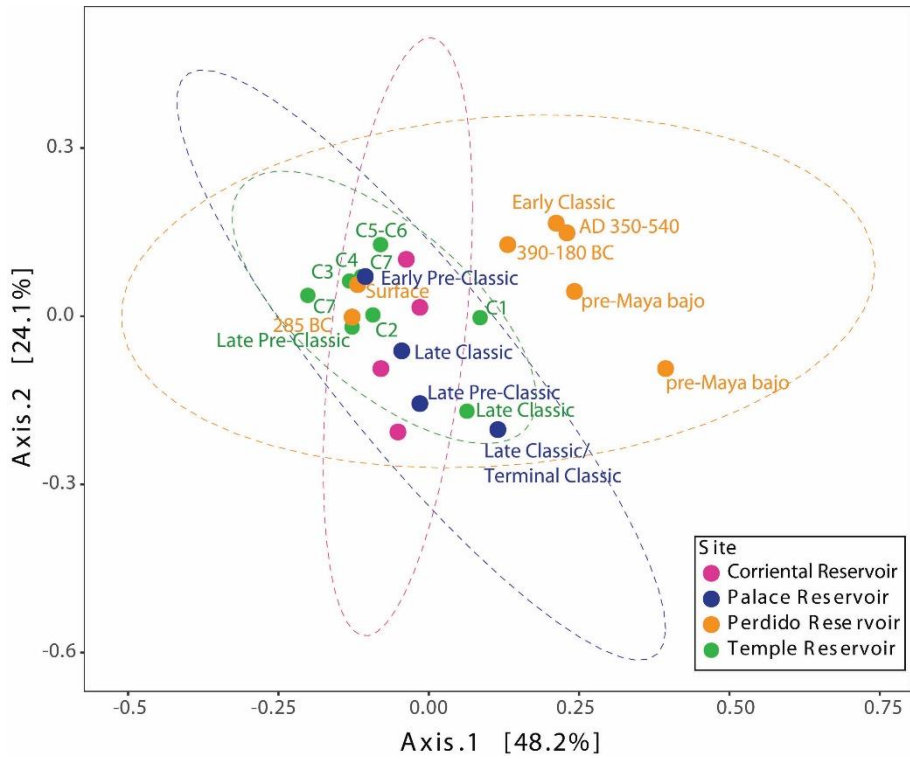

**Supplementary Fig. S4.** Community composition and diversity. Alpha diversity metrics of 16S rRNA gene sequences recovered from Tikal surface and reservoir sediments. Samples were grouped by reservoir.

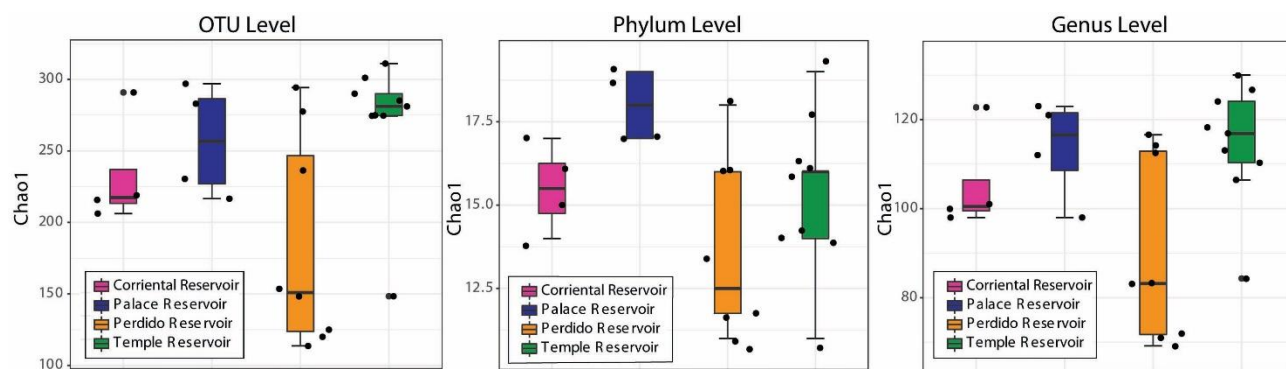

**Supplementary Fig. S5.** Composition of 16S rRNA gene sequences affiliated with bacteria recovered from the reservoir and surface samples. Representative OTUs for each library were binned at the Class level. From this set of taxa, only phototrophic cyanobacteria were included in Fig.4.

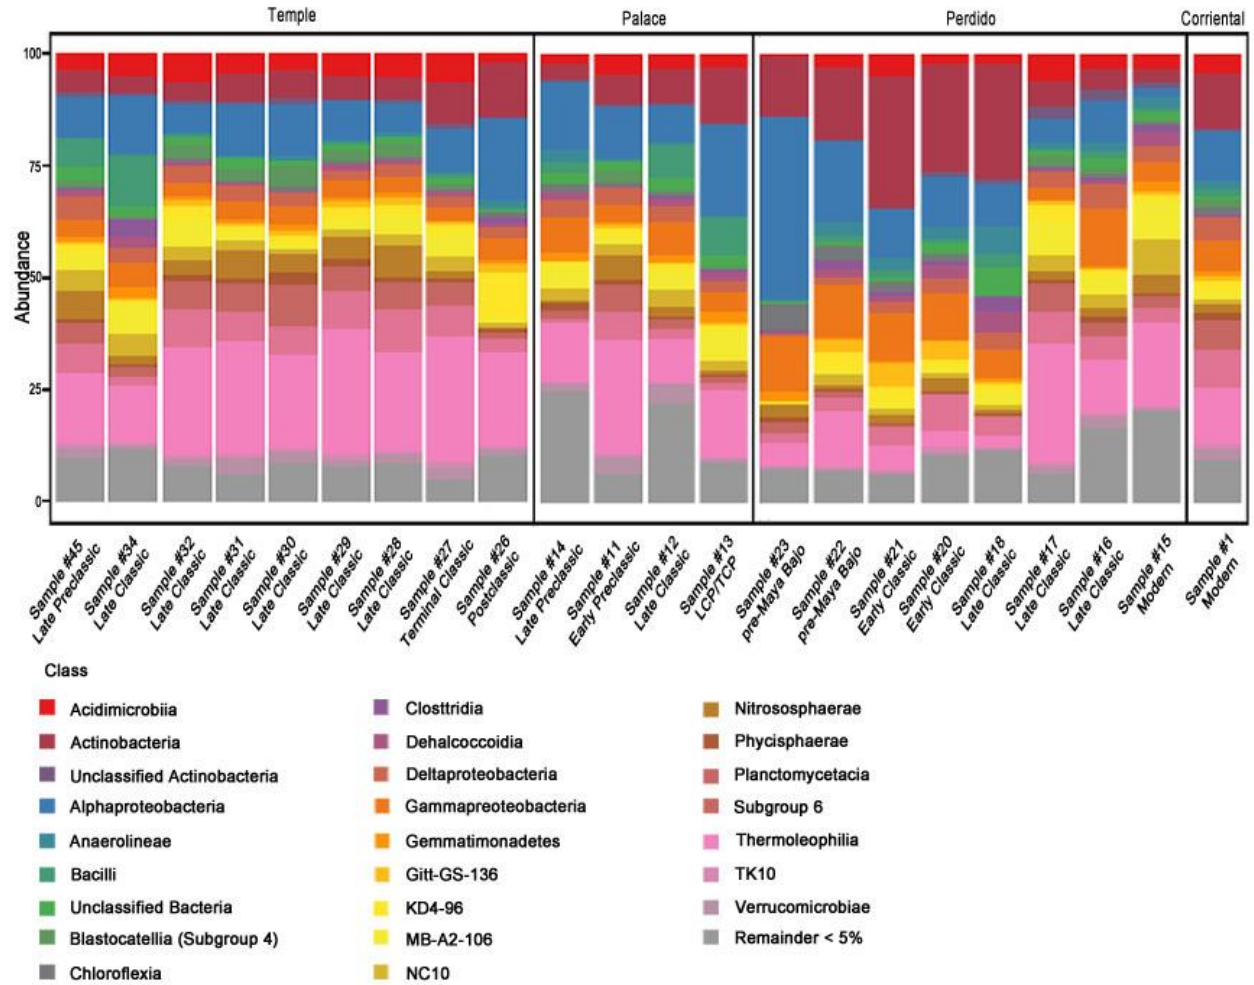

**Supplementary Table S1.** Accelerator mass spectrometry (AMS) radiocarbon ( $^{14}\text{C}$ ) dates for Tikal reservoirs and related contexts discussed in this text. AMS dates were obtained from Beta Analytic (Miami, FL, USA) and the National Ocean Sciences Accelerator Mass Spectrometry Facility (Woods Hole, MA, USA). Data provided include AMS radiocarbon sample composition (SOM = soil organic matter), provenience, depth in cm, measured radiocarbon years before present (BP), and calibrated age at two sigma margins for error. Samples were collected from wet and dry cores and excavation profiles. These data were extracted from larger tables published previously<sup>2,3</sup>.

| Lab Number               | Composition | Reservoir  | Provenience                     | Depth (cm)         | Measured $^{14}\text{C}$ (yr BP) | Calibrated Age (2 $\sigma$ ) |
|--------------------------|-------------|------------|---------------------------------|--------------------|----------------------------------|------------------------------|
| Beta-258720 <sup>a</sup> | Charcoal    | Corriental | Op 1C                           | 65-80              | 990 $\pm$ 40                     | 1010-1170 CE                 |
| Beta-280839 <sup>b</sup> | SOM         | Corriental | Op 1L: Core 8                   | 140-180            | 2,010 $\pm$ 40                   | 340-30 BCE                   |
| Beta-266124 <sup>a</sup> | SOM         | Corriental | Op 1C                           | 162-194            | 2,110 $\pm$ 40                   | 190-80 BCE                   |
| Beta-280837 <sup>b</sup> | SOM         | Corriental | Op 1L: Core 8                   | 180-230            | 2,120 $\pm$ 40                   | 380-170 BCE                  |
| Beta-258721 <sup>a</sup> | SOM         | Corriental | Op 1C                           | 265-290            | 2,340 $\pm$ 40                   | 760-400 BCE                  |
| Beta-270566 <sup>b</sup> | SOM         | Corriental | Op 1L: Core 8                   | 310-312            | 8,960 $\pm$ 60                   | 8290-7970 BCE                |
| Beta-266122 <sup>a</sup> | SOM         | Corriental | Arroyo Op 2A                    | 90                 | 2,110 $\pm$ 40                   | 190-80 BCE                   |
| Beta-274990 <sup>b</sup> | Charcoal    | Corriental | Berm, Op 1L: Core 17            | Anthrosol          | 1,560 $\pm$ 40                   | 400-570 CE                   |
| Beta-266123 <sup>a</sup> | SOM         | Corriental | Pocket Bajo 1, OP 2b            | 60                 | 1,930 $\pm$ 40                   | 90 BCE-80 CE                 |
| 88675 <sup>b</sup>       | SOM         | Corriental | Pocket Bajo 2, Op 1L: Core 21-1 | 50-60              | 6,250 $\pm$ 35                   | 5312-5076 BCE                |
| Beta-281750 <sup>a</sup> | Charcoal    | Palace     | Op 6Q                           | Above Dam Collapse | 1,250 $\pm$ 40                   | 670-880 CE                   |
| Beta-281751 <sup>a</sup> | Charcoal    | Palace     | Op 6Q                           | Below Dam collapse | 1,260 $\pm$ 40                   | 660-880 CE                   |
| Beta-288914 <sup>a</sup> | Charcoal    | Palace     | Op 6L                           | 150                | 1,380 $\pm$ 40                   | 610-680 CE                   |
| Beta-281745 <sup>a</sup> | SOM         | Palace     | Op 6O                           | Channel fill       | 3,310 $\pm$ 40                   | 1870-1850 BCE                |

**Table S1.** Continued.

|                          |          |         |                               |         |             |                 |
|--------------------------|----------|---------|-------------------------------|---------|-------------|-----------------|
| 88638 <sup>a</sup>       | SOM      | Palace  | Op 6J-13: Core 1-1            | 50-60   | 3,360 ± 30  | 1739-1535 BCE   |
| 88682 <sup>a</sup>       | SOM      | Palace  | Op 6J-13: Core 2              | 100-110 | 2,150 ± 40  | 358-55 BCE      |
| Beta-281747 <sup>a</sup> | Charcoal | Perdido | Op 8K                         | 49-54   | 6,810 ± 40  | 5740-5640 BCE   |
| Beta-289287 <sup>b</sup> | SOM      | Perdido | OP 8: Core N2E0               | 50-60   | 2,220 ± 60  | 390-180 BCE     |
| Beta-280828 <sup>a</sup> | SOM      | Perdido | Op 8A                         | 110     | 1,540 ± 40  | 350-540 CE      |
| Beta-289286 <sup>b</sup> | SOM      | Perdido | OP 8: Core N2E0               | 180-190 | 15,110 ± 60 | 16860-16740 BCE |
| Beta-289285 <sup>b</sup> | SOM      | Perdido | OP 8: Core N2E0               | 280-290 | 15,480 ± 60 | 16920-16780 BCE |
| Beta-289284 <sup>b</sup> | SOM      | Perdido | OP 8: Core N2E0               | 390-395 | 15,310 ± 60 | 16820-16670 BCE |
| Beta-281748 <sup>a</sup> | Charcoal | Perdido | Pocket Bajo, Op 8D            | 76-79   | 1,570 ± 40  | 400-570 CE      |
| Beta-281746 <sup>a</sup> | Charcoal | Temple  | Main Tank, Op 7C              | 110     | 1,200 ± 40  | 680-890 CE      |
| 85584 <sup>a</sup>       | SOM      | Temple  | Main Tank, OP 7C              | 130-140 | 1,230 ± 25  | 721-839 CE      |
| 85585 <sup>a</sup>       | SOM      | Temple  | Main Tank, OP 7C              | 140-162 | 1,830 ± 25  | 143-215 CE      |
| 85583 <sup>a</sup>       | SOM      | Temple  | Main Tank, OP 7C              | 162-194 | 1,250 ± 35  | 701-811 CE      |
| 88676 <sup>b</sup>       | SOM      | Temple  | Silting Tank, Op 7: Core 23-2 | 70-80   | 195 ± 35    | 1645-1952 CE    |
| 88677 <sup>b</sup>       | SOM      | Temple  | Silting Tank, Op7: Core 23-2  | 110-120 | 2,330 ± 40  | 521-216 BCE     |
| Beta-298985 <sup>a</sup> | Charcoal | Temple  | Silting Tank, OP7A            | 130     | 1,370 ± 30  | 640-680 CE      |

- a. Sample collected from excavation profile;  
b. Dry core with some compression.  
c. Wet core with compression.



**Supplementary Table S2.** Mercury concentration table. Results shown are displayed in Figure 2.

| ID | Reservoir and Operation | Depth (cm) | Context          | Hg Concentration ( $\mu\text{g/g}$ ) |        |        |                     | SD   | RSD  |
|----|-------------------------|------------|------------------|--------------------------------------|--------|--------|---------------------|------|------|
|    |                         |            |                  | Rep. 1                               | Rep. 2 | Rep. 3 | Avg. of Sample Rep. |      |      |
| 1  | Corriental: 1C          | 10         | Modern           | 1.72                                 | 1.47   | 1.74   | 1.643               | 0.15 | 9%   |
| 2  |                         | 50         | Postclassic      | 1.608                                | 2.42   | 1.6    | 1.89                | 0.46 | 24%  |
| 3  |                         | 70         | Terminal Classic | 1.73                                 | 1.71   | 1.70   | 1.71                | 0.02 | 1%   |
| 4  |                         | 100        | Late Classic     | 1.00                                 | 0.87   | 0.84   | 0.90                | 0.08 | 9%   |
| 5  |                         | 210        | Early Classic    | 0.81                                 | 0.94   | 0.80   | 0.85                | 0.08 | 9%   |
| 6  |                         | 280        | Preclassic       | 0.83                                 | 0.42   | 0.41   | 0.55                | 0.24 | 43%  |
| 7  | Palace: 6L              | 10         | Modern           | 12.32                                | 12.87  | 13.21  | 12.80               | 0.45 | 4%   |
| 8  |                         | 110        | LCP/TCP          | 14.96                                | 16.95  | 15.94  | 15.95               | 1.00 | 6%   |
| 9  |                         | 170        | Late Classic     | 13.35                                | 15.83  | 13.21  | 14.13               | 1.47 | 10%  |
| 10 |                         | 210        | Late Classic     | 5.00                                 | 3.68   | 3.75   | 4.15                | 0.74 | 18%  |
| 11 |                         | 215        | Early Preclassic | 0.94                                 | 0.96   | 0.93   | 0.94                | 0.02 | 2%   |
| 12 | 6L E-Profile            | 179        | Late Classic     | 0.73                                 | 0.63   | 0.54   | 0.63                | 0.10 | 15%  |
| 13 | 6M                      | 130        | LCP/TCP          | 17.27                                | 17.28  | 16.92  | 17.16               | 0.21 | 1%   |
| 14 | 6J                      | 114        | Late Preclassic  | 2.23                                 | 8.68   | 1.05   | 3.99                | 4.11 | 103% |
| 15 | Perdido: 8A             | 10         | Modern           | 1.40                                 | 1.57   | 1.41   | 1.46                | 0.10 | 7%   |
| 16 |                         | 30         | Late Classic     | 1.34                                 | 1.65   | 1.41   | 1.46                | 0.16 | 11%  |
| 17 |                         | 50         | Late Classic     | 1.05                                 | 0.99   | 0.97   | 1.01                | 0.04 | 4%   |
| 18 |                         | 70         | Early Classic    | 1.49                                 | 1.44   | 1.56   | 1.49                | 0.06 | 4%   |
| 19 |                         | 90         | Early Classic    | 2.22                                 | 2.25   | 2.39   | 2.29                | 0.09 | 4%   |
| 20 |                         | 110        | Early Classic    | 0.85                                 | 0.61   | 0.71   | 0.72                | 0.12 | 17%  |
| 21 |                         | 130        | Early Classic    | 0.31                                 | 0.28   | 0.49   | 0.36                | 0.11 | 31%  |
| 22 |                         | 150        | pre-Maya Bajo    | 0.16                                 | 0.16   | 0.21   | 0.18                | 0.03 | 16%  |

**Table S2.** Continued.

| ID | Reservoir and Operation | Depth (cm)      | Context          | Hg Concentration ( $\mu\text{g/g}$ ) |        |        |                     |      |     |
|----|-------------------------|-----------------|------------------|--------------------------------------|--------|--------|---------------------|------|-----|
|    |                         |                 |                  | Rep. 1                               | Rep. 2 | Rep. 3 | Avg. of Sample Rep. | SD   | RSD |
| 23 |                         | 170             | pre-Maya Bajo    | 0.17                                 | 0.22   | 0.26   | 0.22                | 0.05 | 21% |
| 24 | Temple: 7C              | 10              | Modern           | 1.97                                 | 2.61   | 2.64   | 2.41                | 0.38 | 16% |
| 25 |                         | 30              | Postclassic      | 2.14                                 | 2.57   | 2.46   | 2.39                | 0.22 | 9%  |
| 26 |                         | 55              | Postclassic      | 1.73                                 | 1.56   | 1.64   | 1.65                | 0.08 | 5%  |
| 27 |                         | 65              | Terminal Classic | 2.42                                 | 1.99   | 2.65   | 2.35                | 0.33 | 14% |
| 28 |                         | 75              | Late Classic     | 3.09                                 | 2.74   | 2.72   | 2.85                | 0.21 | 7%  |
| 29 |                         | 85              | Late Classic     | 4.57                                 | 4.95   | 4.62   | 4.71                | 0.21 | 4%  |
| 30 |                         | 95              | Late Classic     | 3.96                                 | 4.12   | 4.83   | 4.30                | 0.46 | 11% |
| 31 | 105                     | Late Classic    | 1.88             | 1.55                                 | 1.21   | 1.55   | 0.33                | 22%  |     |
| 32 | 115                     | Late Classic    | 10.14            | 10.52                                | 9.49   | 10.05  | 0.52                | 5%   |     |
| 33 | 179                     | Late Preclassic | 1.11             | 1.15                                 | 1.35   | 1.20   | 0.13                | 11%  |     |
| 34 | 95                      | Late Classic    | 1.63             | 1.57                                 | 1.46   | 1.55   | 0.08                | 5%   |     |
| 35 | 100                     | Late Classic    | 7.89             | 9.39                                 | 9.07   | 8.78   | 0.79                | 9%   |     |

**Supplementary Table S3.** Phosphate readings from four Tikal reservoirs. Results shown here are displayed in Figure 3.

| <b>ID</b> | <b>Reservoir</b> | <b>Provenance</b> | <b>Depth (cm)</b> | <b>Context</b>     | <b>PO<sub>4</sub> (µg/g)</b> |
|-----------|------------------|-------------------|-------------------|--------------------|------------------------------|
| 1         | Corriental       | 1C 1              | 10                | Modern             | 7.62                         |
| 2         |                  | 1C 5              | 50                | Postclassic        | 0.417                        |
| 3         |                  | 1C 7              | 70                | Terminal Classic   | 0.101                        |
| 4         |                  | 1C 10             | 100               | Late Classic       | 0.190                        |
| 5         |                  | 1C 21             | 210               | Early Classic      | 0.188                        |
| 6         |                  | 1C 28             | 280               | Preclassic         | 0.166                        |
| 7         | Palace           | 6L 1b             | 10                | Modern             | 1.04                         |
| 8         |                  | 6L 3b             | 110               | LCP/TCP            | 0.077                        |
| 9         |                  | 6L 6b             | 170               | Late Classic       | 0.930                        |
| 10        |                  | 6L 9b             | 210               | Late Classic       | 0.809                        |
| 11        |                  | 6L 10b            | 215               | Early Preclassic   | 0.210                        |
| 15        | Perdido          | 8A 1              | 10                | Modern             | 0.708                        |
| 17        |                  | 8A 3              | 50                | Late Classic       | 0.07                         |
| 18        |                  | 8A 4              | 70                | Late Classic       | 0.136                        |
| 19        |                  | 8A 5              | 90                | Early Classic      | 0.07                         |
| 20        |                  | 8A 6              | 110               | Early Classic      | 0.157                        |
| 21        |                  | 8A 7              | 130               | Early Classic      | 0.773                        |
| 22        |                  | 8A 8              | 150               | pre-Maya bajo soil | 0.076                        |
| 23        |                  | 8A 9              | 170               | pre-Maya bajo soil | 0.075                        |
| 24        |                  | Temple            | 7C                | 10                 | Modern                       |
| 25        | 7C               |                   | 30                | Postclassic        | 0.074                        |
| 26        | 7C               |                   | 55                | Postclassic        | 0.602                        |
| 27        | 7C               |                   | 65                | Terminal Classic   | 0.186                        |
| 28        | 7C               |                   | 75                | Late Classic       | 0.741                        |

**Table S3.** Continued

---

|    |    |     |              |       |
|----|----|-----|--------------|-------|
| 29 | 7C | 85  | Late Classic | 0.145 |
| 30 | 7C | 95  | Late Classic | 0.09  |
| 31 | 7C | 105 | Late Classic | 0.137 |
| 32 | 7C | 115 | Late Classic | 0.110 |

---

**Supplementary Table S4.** Cyanobacteria from four Tikal reservoirs. Abbreviations key: Late Pre-CI = Late Preclassic period; Early Late CI = Early Late Classic period; and Late/Term CI = Late/Terminal Classic period. Names marked with an “\*” denote an unclassified strain. Results shown are displayed in Figure 4.

| ID# | Reservoir and Operation | Depth (cm)          | Context          | Family                 | Genus                    | Abundance               | OTU   |
|-----|-------------------------|---------------------|------------------|------------------------|--------------------------|-------------------------|-------|
| 26  | Temple: 7C              | 55                  | Postclassic      | Nostocaceae            | Cylindrospermum_NQAIF308 | 9                       | 1922  |
| 28  |                         | 75                  | Late Classic     | Phormidiaceae          | Planktothrix_NIVA-CYA_15 | 44                      | 337   |
|     |                         |                     |                  | Nostocaceae            | Cylindrospermopsis_CRJ1  | 6                       | 464   |
|     |                         |                     |                  | Cyanobacteriaceae      | Annamia_HOs24            | 4                       | 4842  |
|     |                         |                     |                  | Cyanobiaceae           | Cyanobium_PCC-6307       | 3                       | 1170  |
|     |                         |                     |                  | Microcystaceae         | Microcystis_PCC-7914     | 2                       | 314   |
|     |                         |                     |                  | Nodosilineaceae        | Nodosilinea_PCC-7104     | 1                       | 779   |
|     |                         |                     |                  | Nostocaceae            | Aphanizomenon_NIES81     | 1                       | 1661  |
|     |                         |                     |                  | Microcystaceae         | Microcystaceae*          | 1                       | 5691  |
|     |                         |                     |                  | Gloeocapsaceae         | Gleocapsa                | 1                       | 6351  |
|     |                         |                     |                  | Nostocaceae            | Dolichospermum_NIES41    | 1                       | 7506  |
| 30  |                         |                     | 95               | Early Late CI          | Cyanobiaceae             | Synechococcus_MBIC10613 | 1     |
|     |                         |                     | unknown          | Leptolyngbya_ANT.L52.2 | 8                        | 1173                    |       |
|     |                         |                     | Leptolyngbyaceae | Leptolyngbyaceae*      | 4                        | 3312                    |       |
|     |                         |                     | unknown family   | uncultured             | 2                        | 379                     |       |
|     |                         |                     | Nostocaceae      | Scytonema_PCC-7110     | 1                        | 10262                   |       |
|     |                         |                     | uncultured       | uncultured             | 1                        | 16266                   |       |
| 45  | Temple: 7H2             | 33                  | Late Pre-CI      | Phormidiaceae          | Planktothrix_NIVA-CYA_15 | 29                      | 337   |
|     |                         |                     |                  | Cyanobiaceae           | Cyanobium_PCC-6307       | 13                      | 1170  |
|     |                         |                     |                  | Microcystaceae         | Microcystis_PCC-7914     | 3                       | 314   |
|     |                         |                     |                  | Nostocaceae            | Cylindrospermopsis_CRJ1  | 3                       | 464   |
|     |                         |                     |                  | Pseudanabaenaceae      | Pseudanabaena_PCC-7429   | 1                       | 745   |
|     |                         |                     |                  | Nodosilineaceae        | Nodosilinea_PCC-7104     | 1                       | 779   |
|     |                         |                     |                  | Phormidiaceae          | Phormidiaceae_ge         | 1                       | 964   |
|     |                         |                     |                  | Nostocaceae            | Aphanizomenon_NIES81     | 1                       | 1661  |
|     |                         |                     |                  | unknown                | unknown                  | 1                       | 2369  |
|     |                         |                     |                  | Cyanobacteriaceae      | Annamia_HOs24            | 1                       | 4842  |
| 13  | Palace: 6M2             | 130                 | Late/Term CI     | Phormidiaceae          | Planktothrix_NIVA-CYA_15 | 15                      | 337   |
|     |                         |                     |                  | Cyanobiaceae           | Cyanobium_PCC-6307       | 3                       | 1170  |
|     |                         |                     |                  | Microcystaceae         | Microcystis_PCC-7914     | 2                       | 314   |
|     |                         |                     |                  | Nodosilineaceae        | Nodosilinea_PCC-7104     | 2                       | 779   |
|     |                         |                     |                  | Pseudanabaenaceae      | Pseudanabaena_PCC-7429   | 1                       | 745   |
|     |                         |                     |                  | Oxyphotobacteria*      | Oxyphotobacteria*        | 1                       | 5390  |
|     | Gloeocapsaceae          | Gleocapsa           | 1                | 6351                   |                          |                         |       |
| 12  | Palace: 6LE             | 179                 | Late Classic     | Microcystaceae         | Microcystis_PCC-7914     | 325                     | 314   |
|     |                         |                     |                  | Cyanobiaceae           | Cyanobium_PCC-6307       | 77                      | 1170  |
|     |                         |                     |                  | Phormidiaceae          | Planktothrix_NIVA-CYA_15 | 54                      | 337   |
|     |                         |                     |                  | Pseudanabaenaceae      | Pseudanabaena_PCC-7429   | 12                      | 745   |
|     |                         |                     |                  | Oxyphotobacteria*      | Oxyphotobacteria*        | 10                      | 5390  |
|     |                         |                     |                  | Microcystaceae         | Synechocystis_PCC-6803   | 4                       | 10105 |
|     |                         |                     |                  | Nostocaceae            | Aphanizomenon_NIES81     | 3                       | 1661  |
|     |                         |                     |                  | Cyanobacteriaceae      | Annamia_HOs24            | 3                       | 4842  |
|     |                         |                     |                  | Nostocaceae            | Dolichospermum_NIES41    | 3                       | 7506  |
|     |                         |                     |                  | Nostocaceae            | Cylindrospermopsis_CRJ1  | 2                       | 464   |
|     |                         |                     |                  | Leptolyngbyaceae       | Leptolyngbyaceae*        | 2                       | 3312  |
|     |                         |                     |                  | Gloeocapsaceae         | Gleocapsa                | 2                       | 6351  |
|     |                         |                     |                  | Cyanobacteriaceae      | Cyanobacteriaceae*       | 2                       | 10271 |
|     |                         |                     |                  | Leptolyngbyaceae       | Chamaesiphon_PCC-7430    | 2                       | 12438 |
|     |                         |                     |                  | Nodosilineaceae        | Nodosilinea_PCC-7104     | 1                       | 779   |
|     |                         |                     |                  | unknown                | unknown                  | 1                       | 2369  |
|     |                         |                     |                  | Nostocaceae            | Nostocaceae*             | 1                       | 2983  |
|     |                         |                     |                  | Microcystaceae         | Snowella_0TU37S04        | 1                       | 4612  |
|     |                         |                     |                  | Leptolyngbyaceae       | uncultured               | 1                       | 5670  |
|     |                         |                     |                  | Microcystaceae         | Microcystaceae*          | 1                       | 5691  |
|     | Nostocaceae             | Nostoc_PCC-7524     | 1                | 12086                  |                          |                         |       |
|     | Coleofasciculaceae      | Coleofasciculaceae* | 1                | 12117                  |                          |                         |       |

Table S4. Continued.

| ID#              | Reservoir and Operation | Depth (cm) | Context         | Family              | Genus                    | Abundance | OTU   |
|------------------|-------------------------|------------|-----------------|---------------------|--------------------------|-----------|-------|
| 14               | Palace: 6J7             | 114        | Late Preclassic | unknown             | uncultured               | 396       | 379   |
|                  |                         |            |                 | Nodosilineaceae     | Nodosilinea_PCC-7104     | 192       | 779   |
|                  |                         |            |                 | unknown             | Leptolyngbya_ANT.L52.2   | 154       | 1173  |
|                  |                         |            |                 | Nostocaceae         | Calothrix_PCC-6303       | 123       | 1411  |
|                  |                         |            |                 | unknown             | CENA359                  | 58        | 2158  |
|                  |                         |            |                 | unknown             | unknown                  | 45        | 2369  |
|                  |                         |            |                 | Phormidiaceae       | Planktothrix_NIVA-CYA_15 | 40        | 337   |
|                  |                         |            |                 | Leptolyngbyaceae    | Leptolyngbyaceae*        | 30        | 3312  |
|                  |                         |            |                 | Phormidesmiaceae    | Phormidium_MBIC10003     | 27        | 2383  |
|                  |                         |            |                 | Oxyphotobacteria*   | Oxyphotobacteria*        | 27        | 5390  |
|                  |                         |            |                 | Nostocaceae         | Nostocaceae*             | 24        | 2983  |
|                  |                         |            |                 | Cyanobiaceae        | Cyanobium_PCC-6307       | 23        | 1170  |
|                  |                         |            |                 | Unknown             | Oscillatoria_SAG_1459-8  | 22        | 2118  |
|                  |                         |            |                 | Nostocales*         | Nostocales*              | 19        | 4067  |
|                  |                         |            |                 | Nostocaceae         | Nostoc_PCC-73102         | 16        | 3489  |
|                  |                         |            |                 | Leptolyngbyaceae    | YB-42                    | 15        | 3608  |
|                  |                         |            |                 | Leptolyngbyaceae    | Phormidesmis_ANT.L52.6   | 14        | 3665  |
|                  |                         |            |                 | Microcystaceae      | Microcystaceae*          | 14        | 5691  |
|                  |                         |            |                 | Leptolyngbyaceae    | LB3-76                   | 13        | 3828  |
|                  |                         |            |                 | Microcystaceae      | Microcystis_PCC-7914     | 12        | 314   |
|                  |                         |            |                 | Leptolyngbyaceae    | TG-45                    | 12        | 4126  |
|                  |                         |            |                 | unknown             | MTP1.00                  | 8         | 5194  |
|                  |                         |            |                 | Leptolyngbyaceae    | uncultured               | 8         | 5670  |
|                  |                         |            |                 | Nostocaceae         | Calothrix_UAM_374        | 8         | 6905  |
|                  |                         |            |                 | Chroococciopsaceae  | Chroococciopsis_PCC_7203 | 7         | 6890  |
|                  |                         |            |                 | unknown             | Leptolyngbya_VRUC_135    | 5         | 6649  |
|                  |                         |            |                 | Pseudanabaenaceae   | Pseudanabaena_PCC-7429   | 4         | 745   |
|                  |                         |            |                 | unknown             | Calothrix_KVSF5          | 4         | 7393  |
|                  |                         |            |                 | Pseudanabaenaceae   | Synechococcus_PCC-7502   | 3         | 7846  |
|                  |                         |            |                 | Leptolyngbyaceae    | YT-3                     | 3         | 8180  |
|                  |                         |            |                 | unknown             | Phormidium_CYN64         | 3         | 8405  |
|                  |                         |            |                 | Chroococciopsaceae  | uncultured               | 3         | 8734  |
|                  |                         |            |                 | Nodosilineaceae     | uncultured               | 3         | 12012 |
|                  |                         |            |                 | Nostocaceae         | Cylindrospermopsis_CRJ1  | 2         | 464   |
|                  |                         |            |                 | Phormidiaceae       | Phormidiaceae_ge         | 2         | 964   |
|                  |                         |            |                 | Unknown             | CENA518                  | 2         | 9251  |
|                  |                         |            |                 | Cyanobacteriaceae   | Geminocystis_PCC-6308    | 2         | 10266 |
|                  |                         |            |                 | Nodosilineaceae     | Nodosilineaceae*         | 2         | 12017 |
|                  |                         |            |                 | Unknown             | Leptolyngbya_ANT.L67.1   | 2         | 16427 |
|                  |                         |            |                 | Prochlorotrichaceae | Prochlorothrix_PCC-9006  | 1         | 1010  |
|                  |                         |            |                 | Nostocaceae         | Aphanizomenon_NIES81     | 1         | 1661  |
|                  |                         |            |                 | Nostocaceae         | Cuspidothrix_LMECYA_163  | 1         | 4374  |
|                  |                         |            |                 | Cyanobacteriaceae   | Annamia_HOs24            | 1         | 4842  |
|                  |                         |            |                 | Microcystaceae      | SU2_symbiont_group       | 1         | 11927 |
|                  |                         |            |                 | Oscillatoriaceae    | Planktothricoides_SR001  | 1         | 12026 |
|                  |                         |            |                 | Coleofasciculaceae  | Wilmottia_Ant-Ph58       | 1         | 12118 |
|                  |                         |            |                 | Phormidesmiales*    | Phormidesmiales*         | 1         | 12292 |
| Leptolyngbyaceae | Chamaesiphon_PCC-7430   | 1          | 12438           |                     |                          |           |       |
| Leptolyngbyaceae | Leptolyngbya_PCC-6306   | 1          | 12440           |                     |                          |           |       |
| RD011_fa         | RD011_ge                | 1          | 16247           |                     |                          |           |       |
| 1                | Corriental: 1C          | 10         | Modern          | unknown             | Oscillatoria_SAG_1459-8  | 11        | 2118  |
|                  |                         |            |                 | unknown             | EcFYyy-200               | 6         | 6027  |

**Table S4.** Continued.

| ID#                 | Reservoir and Operation  | Depth (cm) | Context       | Family                 | Genus                      | Abundance | OTU    |
|---------------------|--------------------------|------------|---------------|------------------------|----------------------------|-----------|--------|
| 1                   | Corriental 1C            | 10         | Modern        | unknown                | uncultured                 | 3         | 379    |
|                     |                          |            |               | unknown                | Leptolyngbya_ANT.L52.2     | 3         | 1173   |
|                     |                          |            |               | unknown                | Unknown*                   | 3         | 2369   |
|                     |                          |            |               | Oxyphotobacteria*      | Oxyphotobacteria*          | 3         | 5390   |
|                     |                          |            |               | Nostocaceae            | Scytonema_PCC-7110         | 3         | 10262  |
|                     |                          |            |               | Nostocaceae            | Nostocaceae*               | 2         | 2983   |
|                     |                          |            |               | Chroococcidiopsaceae   | Chroococcidiopsis_PCC_7203 | 2         | 6890   |
|                     |                          |            |               | uncultured             | uncultured_ge              | 2         | 10207  |
|                     |                          |            |               | Coleofasciculaceae     | Microcoleus_SAG_1449-1a    | 2         | 10263  |
|                     |                          |            |               | Leptolyngbyaceae       | JSC-12                     | 2         | 11267  |
|                     |                          |            |               | Phormidiaceae          | Tychonema_CCAP_1459-11B    | 1         | 11940  |
|                     |                          |            |               | Thermosynechococcaceae | Synechococcus_IR11         | 1         | 16248  |
|                     |                          |            |               | 15                     | Perdido: 8A                | 10        | Modern |
| Nodosilineaceae     | Nodosilinea_PCC-7104     | 218        | 779           |                        |                            |           |        |
| Phormidiaceae       | Planktothrix_NIVA-CYA_15 | 209        | 337           |                        |                            |           |        |
| Pseudanabaenaceae   | Pseudanabaena_PCC-7429   | 163        | 745           |                        |                            |           |        |
| Prochlorothrixaceae | Prochlorothrix_PCC-9006  | 100        | 1010          |                        |                            |           |        |
| Phormidiaceae       | Phormidiaceae_ge         | 94         | 964           |                        |                            |           |        |
| Cyanobiaceae        | Cyanobium_PCC-6307       | 82         | 1170          |                        |                            |           |        |
| Nostocaceae         | Aphanizomenon_NIES81     | 46         | 1661          |                        |                            |           |        |
| Microcystaceae      | Microcystis_PCC-7914     | 38         | 314           |                        |                            |           |        |
| Nostocaceae         | Cuspidothrix_LMECYA_163  | 10         | 4374          |                        |                            |           |        |
| Microcystaceae      | Snowella_OTU37S04        | 9          | 4612          |                        |                            |           |        |
| Oxyphotobacteria*   | Oxyphotobacteria*        | 9          | 5390          |                        |                            |           |        |
| Microcystaceae      | Microcystaceae*          | 4          | 5691          |                        |                            |           |        |
| Nostocales*         | Nostocales_unclassified  | 2          | 4067          |                        |                            |           |        |
| unknown             | uncultured               | 1          | 379           |                        |                            |           |        |
| Cyanobacteriaceae   | Annamia_HOs24            | 1          | 4842          |                        |                            |           |        |
| Gloeocapsaceae      | Gloeocapsa               | 1          | 6351          |                        |                            |           |        |
| unknown             | Calothrix_KVSF5          | 1          | 7393          |                        |                            |           |        |
| Nostocaceae         | Dolichospermum_NIES41    | 1          | 7506          |                        |                            |           |        |
| Nodosilineaceae     | Nodosilineaceae*         | 1          | 12017         |                        |                            |           |        |
| Microcystaceae      | Merismopedia_0BB39S01    | 1          | 12084         |                        |                            |           |        |
| Nostocaceae         | Aphanizomenon_MDT14a     | 1          | 12132         |                        |                            |           |        |
| Xenococcaceae       | Xenococcus_CRM           | 1          | 12148         |                        |                            |           |        |
| Nodosilineaceae     | Nodosilineaceae_ge       | 1          | 12436         |                        |                            |           |        |
| Pseudanabaenaceae   | uncultured               | 1          | 13135         |                        |                            |           |        |
| 23                  |                          | 170        | pre-Maya Bajo | Nostocaceae            | Cylindrospermum_NQAIF308   | 28        | 1922   |

## Supplementary References

1. Houston, S. D., & Inomata, T. *The Classic Maya* (Cambridge University Press, 2009).
2. Scarborough, V. L. *et al.*, Water and sustainable land use in an ancient tropical city: Tikal, Guatemala. *Proc. Natl. Acad. Sci.* **109**, 12408-12413 (2012).
3. Lentz, D. L., Dunning, N. P., & Scarborough, V.L. (eds.) *Tikal: Paleoecology of an Ancient Maya City* (Cambridge University Press, 2015).
